# Supplementary material for: EsDREB2B, a novel truncated DREB2-type transcription factor in the desert legume Eremosparton songoricum, enhances tolerance to multiple abiotic stresses in yeast and transgenic tobacco
Source: PubMed Central journal article supplement (PMC3940028; doi:10.1186/1471-2229-14-44), 2014-02-10

**Additional file 1:** Sequence logo for the CMIV-4 motif of the truncated proteins.

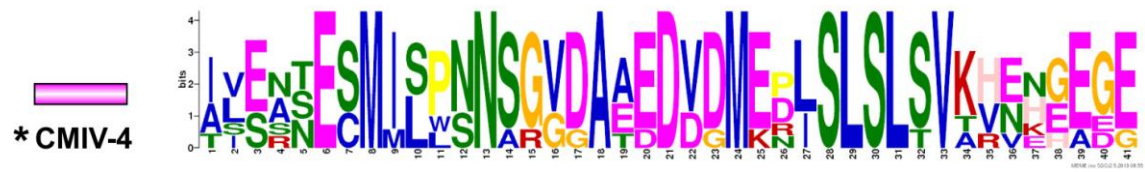

Supplement: 1471-2229-14-44-S1.pdf [file 1471-2229-14-44-S1.pdf]
