# Supplementary material for: EsDREB2B, a novel truncated DREB2-type transcription factor in the desert legume Eremosparton songoricum, enhances tolerance to multiple abiotic stresses in yeast and transgenic tobacco
Source: PubMed Central journal article supplement (PMC3940028; doi:10.1186/1471-2229-14-44), 2014-02-10

**Additional file 3:**

Tissue expression pattern of *EsDREB2B* in two-week old *E. songoricum* seedling under normal condition. The relative gene expression level of *EsDREB2B* gene were calculated relative to leaf sample using  $2^{-\Delta\Delta CT}$  method. Error bars indicate SD (n = 3).

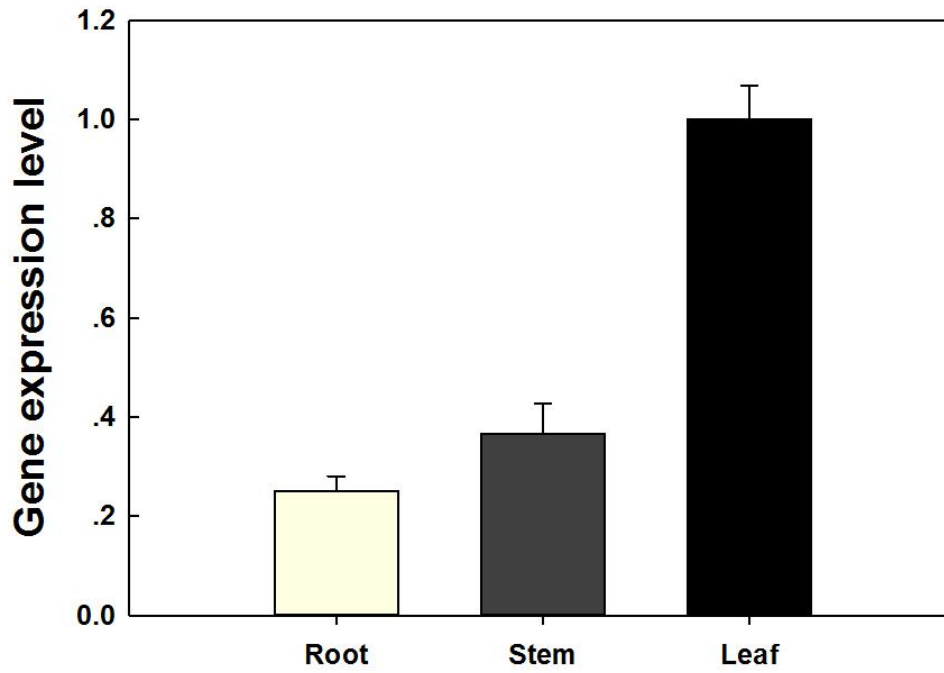

Supplement: 1471-2229-14-44-S3.pdf [file 1471-2229-14-44-S3.pdf]
